# Supplementary material for: TOP2B is required for compartment strength changes upon retinoic acid treatment in SH-SY5Y cells
Source: Springer Nature journal article supplement (doi:10.1007/s10577-025-09764-4), 2025-04-04
Supplement: MOESM1 [file 10577_2025_9764_MOESM1_ESM.pdf]

## Supplementary Figures

**Figure S1. Example locus *VAT1L*.** Top – Hi-C interaction map and Eigenvector 1 plot of a ~6Mb region of Chr16 containing the *VAT1L* locus from WT control, WT ATRA-treated, BKO control and BKO ATRA-treated cells (light blue: WT Ctrl, dark blue: WT ATRA, light green: BKO Ctrl, dark green: BKO ATRA). Middle – zoomed-in E1 plot containing the *VAT1L* gene (red: A compartment, blue: B compartment). Bottom Log2 fold change RNA-seq values for *VAT1L* in indicated comparisons.

**Figure S2. Example locus *FGFR2*.** Top – Hi-C interaction map and Eigenvector 1 plot of a ~4Mb region of Chr10 containing the *FGFR2* locus, from WT control, WT ATRA-treated, BKO control and BKO ATRA-treated cells. (light blue: WT Ctrl, dark blue: WT ATRA, light green: BKO Ctrl, dark green: BKO ATRA). Middle – zoomed-in E1 plot containing the *FGFR2* gene (red: A compartment, blue: B compartment). Bottom Log2 fold change RNA-seq values for *FGFR2* in indicated comparisons.

**Figure S3. Example locus *CYP26B1*.** Top – Hi-C interaction map and Eigenvector 1 plot of a ~5Mb region of Chr10 containing the *CYP26B1* locus, from WT control, WT ATRA-treated, BKO control and BKO ATRA-treated cells (light blue: WT Ctrl, dark blue: WT ATRA, light green: BKO Ctrl, dark green: BKO ATRA). Middle – zoomed-in E1 plot containing the *CYP26B1* gene (red: A compartment, blue: B compartment). Bottom Log2 fold change RNA-seq values for *CYP26B1* in indicated comparisons.

**Figure S4. Example locus *NTRK2*.** Top – Hi-C interaction map and Eigenvector 1 plot of a ~5Mb region of Chr10 containing the *NTRK2* locus, from WT control, WT ATRA-treated, BKO control and BKO ATRA-treated cells (light blue: WT Ctrl, dark blue: WT ATRA, light green: BKO Ctrl, dark green: BKO ATRA). Middle – zoomed-in E1 plot containing the *NTRK2* gene (red: A compartment, blue: B compartment). Bottom Log2 fold change RNA-seq values for *NTRK2* in indicated comparisons.

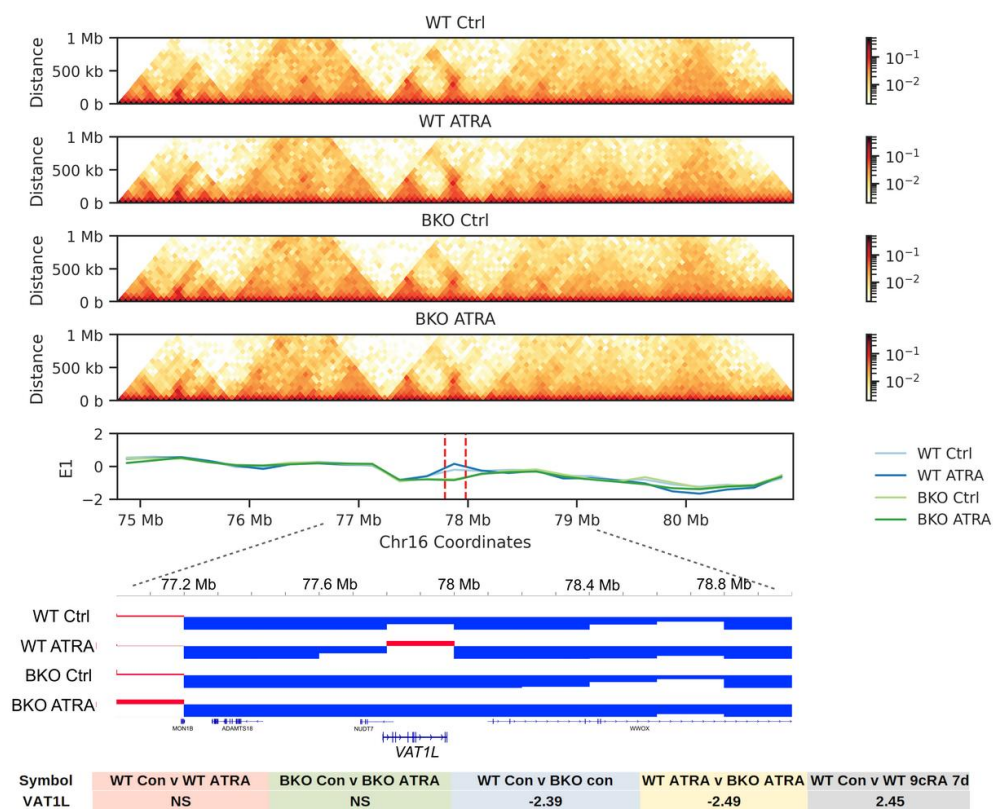

Figure S1

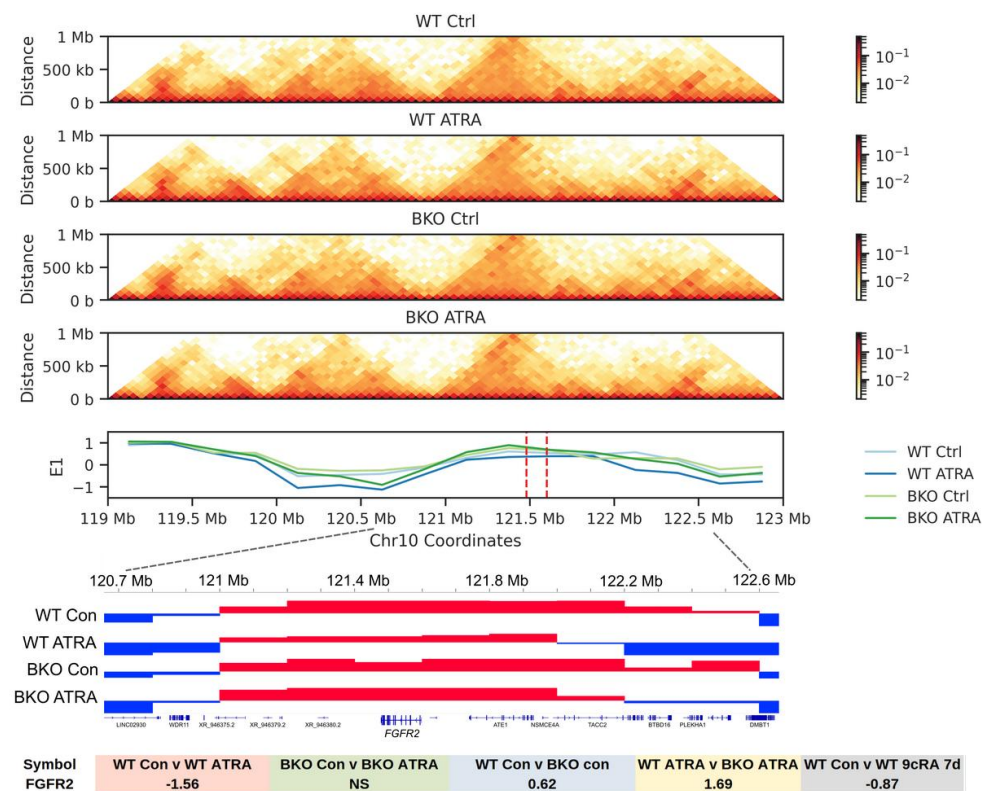

Figure S2

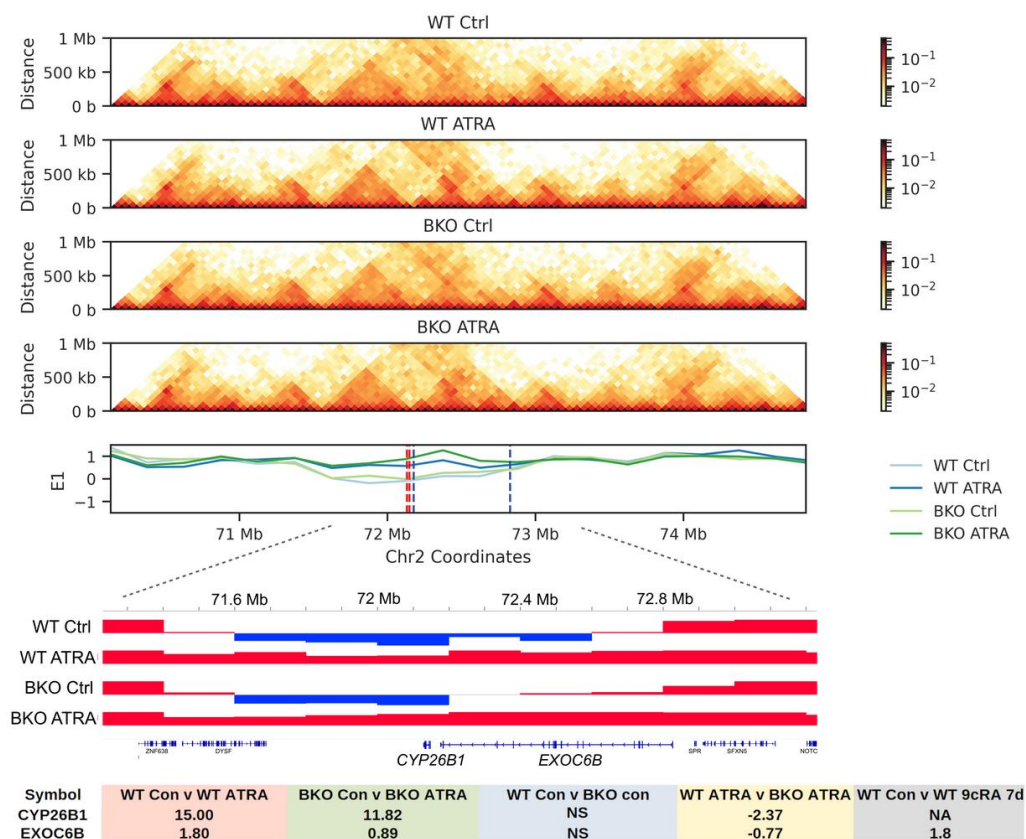

Figure S3

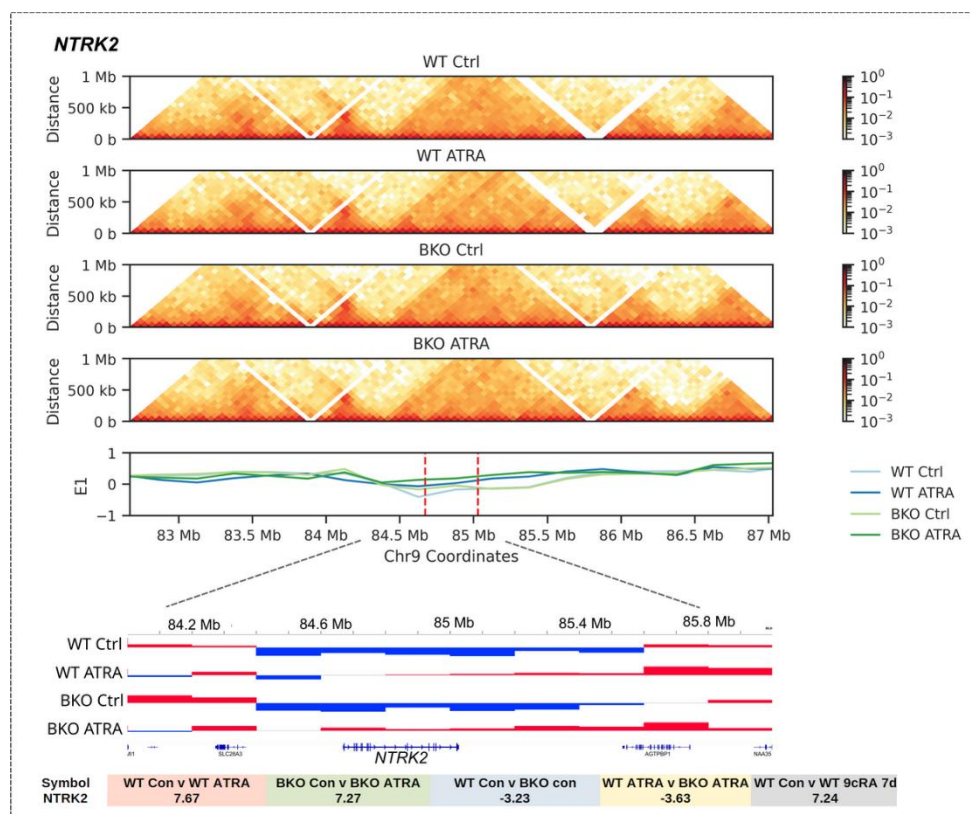

Figure S4
